# Supplementary material for: Development and Degeneration of the Intervertebral Disc—Insights from Across Species
Source: MDPI journal article supplement (doi:10.3390/vetsci10090540), 2023-08-24
Supplement: s1 [file s1]

*Supplementary table1: Abbreviations of genes or proteins*

| <b>Abbreviation as Referenced</b> | <b>Official Abbreviation</b> | <b>Official Full Name</b>                                  | <b>NCBI Gene ID</b>           |
|-----------------------------------|------------------------------|------------------------------------------------------------|-------------------------------|
| Acan                              | Acan                         | aggrecan                                                   | Rat: 58968                    |
| Acp5                              | Acp5                         | acid phosphatase 5                                         | Rat: 25732                    |
| ADAMTS-4                          | ADAMTS4                      | ADAM metalloproteinase with thrombospondin type 1 motif 4  | Human: 9507<br>Bovine: 286806 |
| ADAMTS5                           | ADAMTS5                      | ADAM metalloproteinase with thrombospondin type 1 motif 5  | Human: 11096<br>Mouse: 23794  |
| Adamts17                          | ADAMTS17                     | ADAM metalloproteinase with thrombospondin type 1 motif 17 | Bovine: 538131                |
| ADIRF                             | ADIRF                        | adipogenesis regulatory factor                             | Human: 10974                  |
| Akap12                            | Akap12                       | A-kinase anchoring protein 12                              | Rat: 83425                    |
| Aldh1a1                           | Aldha1a1                     | aldehyde dehydrogenase 1 family, member A1                 | Rat: 24188                    |
| Ang1                              | ANGPT1                       | angiopoietin 1                                             | Human: 284                    |
| Anxa3                             | Anxa3                        | annexin A3                                                 | Mouse: 11745                  |
| Atp6v1g3                          | ATP6V1G3                     | ATPase H <sup>+</sup> transporting V1 subunit G3           | Bovine: 613925                |
| Basp1                             | BASP1                        | brain abundant, membrane attached signal protein 1         | Human: 10409<br>Rat: 70350    |
| BDNF                              | BDNF                         | brain derived neurotrophic factor                          | Porcine: 617701               |
| Bmp7                              | Bmp7                         | bone morphogenetic protein 7                               | Rat: 85272                    |
| Bpifa1a                           | Bpifa1                       | BPI fold containing family A member 1                      | Human: 51297                  |
| Bpifb1                            | Bpifb1                       | BPI fold containing family B, member 1                     | Rat: 499926                   |
| C10ORF10                          | DEPP1                        | DEPP autophagy regulator 1                                 | Human: 11067                  |
| C1qtnf3                           | C1QTNF3                      | C1q and TNF related 3                                      | Bovine: 531659                |
| C2ORF40                           | ECRG4                        | ECRG4 augurin precursor                                    | Human: 84417                  |
| Ca3                               | Car3                         | carbonic anhydrase 3                                       | Mouse: 12350                  |
| CALCR                             | CALCR                        | calcitonin receptor                                        | Goat: 102184585               |
| CAPS                              | CAPS                         | calcyphosine                                               | Human: 828                    |
| CASPASE-1                         | CASP1                        | caspase 1                                                  | Human: 834                    |
| Caspase-12                        | Casp12                       | caspase 12                                                 | Rat: 156117                   |
| Caspase-3                         | CASP3                        | caspase 3                                                  | Bovine: 408016                |

|                |         |                                                         |                                               |
|----------------|---------|---------------------------------------------------------|-----------------------------------------------|
| CAV1           | CAV1    | caveolin 1                                              | Goat: 100860749                               |
| CCL20          | CCL20   | C-C motif chemokine ligand 20                           | Human: 6364                                   |
| CCL5           | CCL5    | C-C motif chemokine ligand 5                            | Human: 6352                                   |
| CCL7           | CCL7    | C-C motif chemokine ligand 7                            | Human: 6354                                   |
| Ccn3           | CCN3    | cellular communication network factor 3                 | Bovine: 505727                                |
| CCR7           | CCR7    | C-C motif chemokine receptor 7                          | Human: 1236                                   |
| CD109          | CD109   | CD109 antigen                                           | Human: 135228<br>Mouse: 235505                |
| CD155          | PVR     | PVR cell adhesion molecule                              | Human: 5817                                   |
| CD163          | CD163   | CD163 molecule                                          | Human: 9332                                   |
| CD206          | MRC1    | mannose receptor C-type 1                               | Human: 4360                                   |
| CD221          | IGF1R   | insulin like growth factor 1 receptor                   | Human: 3480                                   |
| CD24           | CD24    | CD24 molecule                                           | Human: 100133941<br>Rat: 25145                |
| CD44           | Cd44    | CD44 antigen                                            | Mouse: 12505                                  |
| CD55           | CD55    | CD55 molecule                                           | Bovine: 518609                                |
| CD81           | CD81    | CD81 antigen                                            | Mouse: 12520                                  |
| CD90           | THY1    | Thy-1 cell surface antigen                              | Human: 7070<br>Mouse: 21838<br>Bovine: 614712 |
| Cdh2           | Cdh2    | cadherin 2                                              | Human: 1000<br>Mouse: 12558<br>Bovine: 281062 |
| Chcd7          | Chcd7   | coiled-coil-helix-coiled-coil-helix domain containing 7 | Human: 79145                                  |
| CHI3L1         | CHI3L1  | chitinase 3 like 1                                      | Human: 1116                                   |
| CHI3L2         | CHI3L2  | chitinase 3 like 2                                      | Human: 1117                                   |
| Cilp           | Cilp    | cartilage intermediate layer protein                    | Rat: 315761                                   |
| CLC            | CLC     | Charcot-Leyden crystal galectin                         | Monkey: 102120083                             |
| CLEC3A         | CLEC3A  | C-type lectin domain family 3 member A                  | Human: 10143                                  |
| CLND1          | CLDN1   | Claudin 1                                               | Human: 9076                                   |
| CNTFR          | Cntfr   | ciliary neurotrophic factor receptor                    | Mouse: 12804                                  |
| Col10a1, Col10 | Col10a1 | collagen, type X, alpha 1                               | Mouse: 12813<br>Rat: 25681                    |

|              |            |                                                  |                                               |
|--------------|------------|--------------------------------------------------|-----------------------------------------------|
| Col11a1      | Col11a1    | collagen type XI alpha 1 chain                   | Rat: 25654                                    |
| Col12a1      | Col12a1    | collagen, type XII, alpha 1                      | Human: 1303<br>Mouse: 12816                   |
| COL2A1, Col2 | COL2A1     | Collagen type II alpha chain 1                   | Human: 1280<br>Mouse: 12824<br>Rat: 25412     |
| COL5A1       | COL5A1     | collagen type V alpha 1 chain                    | Human: 1289<br>Mouse: 12831                   |
| Col5a2       | Col5a2     | collagen, type V, alpha 2                        | Mouse: 12832                                  |
| Col8a1       | Col8a1     | collagen type VIII alpha 1 chain                 | Rat: 304021                                   |
| Comp         | COMP       | cartilage oligomeric matrix protein              | Human: 1311<br>Bovine: 281088                 |
| Cox2         | COX2       | cytochrome c oxidase subunit II                  | Dog: 804479<br>Bovine: 3283880                |
| COX2         | MT-CO2     | mitochondrially encoded cytochrome c oxidase II  | Human: 4513                                   |
| Cp           | CP         | ceruloplasmin                                    | Bovine: 514194                                |
| Creld2       | CRELD2     | cysteine rich with EGF like domains 2            | Bovine: 515222                                |
| CRP          | CRP        | C-reactive protein                               | Human: 1401                                   |
| CTGF         | CCN2       | cellular communication network factor 2          | Human: 374135                                 |
| CTSK         | CTSK       | cathepsin K                                      | Human: 1513<br>Bovine: 513038                 |
| CXCL12       | CXCL12     | C-X-C motif chemokine ligand 12                  | Human: 6387                                   |
| Cxcl3        | Cxcl3      | C-X-C motif chemokine ligand 3                   | Rat: 171551                                   |
| CXCL6        | CXCL6      | C-X-C motif chemokine ligand 6                   | Human: 6372                                   |
| Cytochrome c | Cycs       | Cytochrome c, somatic                            | Rat: 25309                                    |
| Dcn          | DCN        | decorin                                          | Human: 1634<br>Bovine: 280760                 |
| Dnajc3       | DNAJC3     | DnaJ heat shock protein family (Hsp40) member C3 | Bovine: 286770                                |
| ENG          | ENG, CD105 | endoglin                                         | Human:2022<br>Mouse: 13805<br>Goat: 102169304 |
| EPYC         | EPYC       | epiphykan                                        | Human: 1833                                   |
| ERK1         | MAPK3      | mitogen-activated protein kinase 3               | Human: 5595                                   |
| ERK2         | MAPK1      | mitogen-activated protein kinase 1               | Human: 5594                                   |

|                                 |        |                                              |                                                                    |
|---------------------------------|--------|----------------------------------------------|--------------------------------------------------------------------|
| Fas                             | Fas    | Fas cell surface death receptor              | Human: 355                                                         |
| FBLN1                           | FBLN1  | fibulin 1                                    | Human: 2192                                                        |
| FBXO2                           | FBXO2  | F-box protein 2                              | Human: 26232                                                       |
| FGFBP2                          | FGFBP2 | fibroblast growth factor binding protein 2   | Human: 83888                                                       |
| Fibin                           | Fibin  | fin bud initiation factor homolog            | Rat: 499856                                                        |
| Fn1                             | FN1    | fibronectin 1                                | Human: 2335<br>Mouse: 14268<br>Rat: 25661<br>Bovine: 280794        |
| FRZB                            | FRZB   | frizzled related protein                     | Human: 2487                                                        |
| FTH                             | Fth1   | ferritin heavy chain 1                       | Rat: 25319                                                         |
| GADD153                         | Ddit3  | DNA-damage inducible transcript 3            | Rat: 29467                                                         |
| Gasdermin-D                     | Gsdmd  | Gasdermin D                                  | Human: 79792<br>Mouse: 69146<br>Rat: 315084                        |
| GCH1                            | GCH1   | GTP cyclohydrolase 1                         | Human: 2643                                                        |
| Gfap                            | Gfap   | glial fibrillary acidic protein              | Equine: 100033970                                                  |
| Gli1                            | GLI1   | GLI family zinc finger 1                     | Human: 2735<br>Mouse: 14632<br>Bovine: 517588<br>Monkey: 102136450 |
| Gli3                            | GLI3   | GLI family zinc finger 3                     | Human:<br>Mouse: 14634<br>Bovine: 785371                           |
| Glutamic-oxalocetictransaminase | GOT1   | glutamic-oxaloacetic transaminase 1          | Equine: 100060793                                                  |
| GPX4                            | Gpx4   | glutathione peroxidase 4                     | Rat: 29328                                                         |
| GRB10                           | GRB10  | growth factor receptor bound protein 10      | Human: 2887                                                        |
| GRP78                           | Hspa5  | heat shock protein family A (Hsp70) member 5 | Rat: 25617                                                         |
| Gsn                             | GSN    | gelsolin                                     | Bovine: 535077                                                     |
| H2ac18                          | H2AC18 | H2A clustered histone 18                     | Bovine: 541108                                                     |
| HIF1 $\alpha$                   | HIF1A  | hypoxia inducible factor 1 subunit alpha     | Monkey: 101866092                                                  |
| HMGA1                           | HMGA1  | high mobility group AT-hook 1                | Human: 3159                                                        |
| hydroxylysine                   | HYKK   | hydroxylysine kinase                         | Equine: 100060343                                                  |
| ID1                             | ID1    | inhibitor of DNA binding 1                   | Human: 3397                                                        |
| ID3                             | ID3    | inhibitor of DNA binding 3                   | Human: 3399                                                        |

|              |        |                                                               |                                                                |
|--------------|--------|---------------------------------------------------------------|----------------------------------------------------------------|
| IFN $\gamma$ | IFNG   | interferon gamma                                              | Human: 3458                                                    |
| IGF1         | IGF1   | insulin like growth factor 1                                  | Human: 3479                                                    |
| Igfbp5       | Igfbp5 | insulin-like growth factor binding protein 5                  | Rat: 25285                                                     |
| Igfbp6       | IGFBP6 | insulin like growth factor binding protein 6                  | Bovine: 404186                                                 |
| IHH          | IHH    | Indian hedgehog signaling molecule                            | Monkey: 102136990                                              |
| IL10         | IL10   | interleukin 10                                                | Human: 3586<br>Rat: 25325                                      |
| IL11         | IL11   | Interleukin 11                                                | Rat: 171040                                                    |
| IL12         | IL12b  | Interleukin 12B                                               | Rat: 64546                                                     |
| IL17         | IL17a  | Interleukin 17a                                               | Human: 3605                                                    |
| IL18         | IL18   | interleukin 18                                                | Human: 3606<br>Rat: 29197                                      |
| IL1 $\beta$  | IL1B   | interleukin 1 beta                                            | Human: 3553<br>Porcine: 281251<br>Bovine: 281251<br>Rat: 24494 |
| IL4          | IL4    | Interleukin 4                                                 | Human: 3565                                                    |
| IL6          | IL6    | interleukin 6                                                 | Human: 3569<br>Porcine: 280826<br>Bovine: 280826               |
| IL8          | CXCL8  | C-X-C motif chemokine ligand 8                                | Human: 3576<br>Dog: 403850<br>Bovine: 280828                   |
| Inhba        | Inhba  | inhibin subunit beta A                                        | Rat: 29200                                                     |
| ISL1         | ISL1   | ISL LIM homeobox 1                                            | Human: 3670                                                    |
| KRT18        | Krt18  | keratin 18                                                    | Human: 3875<br>Mouse: 16668<br>Equine: 100063542               |
| Krt19        | Krt19  | keratin 19                                                    | Human: 3880<br>Mouse: 16669                                    |
| Krt7         | Krt7   | keratin 7                                                     | Rat: 300242                                                    |
| Krt8         | Krt8   | keratin 8                                                     | Human: 3856<br>Mouse: 16691<br>Bovine: 281269                  |
| Lam1         | LAM1   | Lam1p                                                         | S. cerevisiae: 856560                                          |
| LCN2         | LCN2   | lipocalin 2                                                   | Human: 3934                                                    |
| Lect1        | Cnmd   | chondromodulin                                                | Mouse: 16840                                                   |
| LGALS1       | LGALS1 | galectin 1                                                    | Human: 3956<br>Bovine: 326598                                  |
| LIF          | LIF    | LIF interleukin 6 family cytokine; Leukemia Inhibitory Factor | Human: 3976<br>Mouse: 16878                                    |

|              |              |                                                                |                                           |
|--------------|--------------|----------------------------------------------------------------|-------------------------------------------|
| Loc101904175 | LOC101904175 | uncharacterized<br>LOC101904175                                | Bovine: 101904175                         |
| Lum          | Lum          | lumican                                                        | Mouse: 17022<br>Rat: 81682                |
| LYN          | LYN          | LYN proto-oncogene, Src<br>family tyrosine kinase              | Human: 4067                               |
| MAP1B        | MAP1B        | microtubule associated<br>protein 1B                           | Human: 4131                               |
| MFG-E8       | MFGE8        | milk fat globule EGF and<br>factor V/VIII domain<br>containing | Human: 4240                               |
| MGP          | MGP          | matrix Gla protein                                             | Human: 4256<br>Bovine: 282660             |
| MGST1        | MGST1        | microsomal glutathione S-<br>transferase 1                     | Human: 4257                               |
| MMP1         | MMP1         | matrix metalloproteinase 1<br>(interstitial collagenase)       | Bovine: 281308                            |
| MMP13        | MMP13        | matrix metalloproteinase<br>13                                 | Human: 4322                               |
| Mmp3         | MMP3         | matrix metalloproteinase 3                                     | Bovine: 4314<br>Rat: 171045               |
| MMP7         | MMP7         | matrix metalloproteinase 7                                     | Human: 4316                               |
| MMP8         | MMP8         | matrix metalloproteinase 8                                     | Human: 4317                               |
| MMP9         | MMP9         | matrix metalloproteinase 9                                     | Human: 4318                               |
| Mmp13        | Mmp13        | matrix metalloproteinase<br>13                                 | Rat: 171052<br>Human: 4322                |
| MSMP         | MSMP         | microseminoprotein,<br>prostate associated                     | Human: 692094                             |
| MT-ND2       | MTND2        | mitochondrially encoded<br>NADH dehydrogenase 2                | Human: 4536                               |
| MT1F         | MT1F         | metallothionein 1F                                             | Human: 4494                               |
| MT1G         | MT1G         | metallothionein 1G                                             | Human: 4495                               |
| MT2A         | MT2A         | metallothionein 2A                                             | Human: 4502                               |
| MTCYB        | MT-CYB       | mitochondrially encoded<br>cytochrome b                        | Human: 4519                               |
| MyD88        | MYD88        | MYD88 innate immune<br>signal transduction<br>adaptor          | Human: 4615                               |
| Myoc         | Myoc         | myocilin                                                       | Rat: 81523                                |
| NAMPT        | NAMPT        | nicotinamide<br>phosphoribosyltransferase                      | Human: 10135                              |
| Ncdn         | Ncdn         | neurochondrin                                                  | Rat: 89791<br>Human: 23154                |
| NF-kB        | NFKB1        | nuclear factor kappa B<br>subunit 1                            | Human: 4790<br>Mouse: 18033<br>Rat: 81736 |
| NGF          | NGF          | nerve growth factor                                            | Human: 4803                               |

|          |                                      |                                                                       |                                                     |
|----------|--------------------------------------|-----------------------------------------------------------------------|-----------------------------------------------------|
|          |                                      |                                                                       | Bovine: 281350<br>Porcine: 281350                   |
| Ngfr     | NGFR                                 | nerve growth factor receptor                                          | Bovine: 353110                                      |
| NLRP3    | NLRP3                                | NLR family pyrin domain containing 3                                  | Human: 114548<br>Rat: 287362                        |
| NOD2     | NOD2                                 | nucleotide binding oligomerization domain containing 2                | Human: 64127                                        |
| Noto     | NOTO                                 | notochord homeobox                                                    | Human: 344022<br>Mouse: 384452<br>Bovine: 100335771 |
| NRP-1    | NRP1                                 | neuropilin 1                                                          | Human: 8829<br>Rat: 246331                          |
| p38 MAPK | Mapk14                               | mitogen activated protein kinase 14                                   | Human: 1432<br>Mouse: 26416<br>Rat: 81649           |
| p53      | TP53                                 | tumor protein p53                                                     | Human: 7157<br>Mouse: 22059<br>Bovine: 281542       |
| Pdia4    | PDIA4                                | protein disulfide isomerase family A member 4                         | Bovine: 415110                                      |
| PECAM1   | PECAM1                               | platelet and endothelial cell adhesion molecule 1                     | Goat: 102179808                                     |
| PI3K     | PIK3CB                               | phosphatidylinositol-4,5-bisphosphate 3-kinase catalytic subunit beta | Human: 5291                                         |
| PLA2G2A  | PLA2G2A                              | phospholipase A2 group IIA                                            | Human: 5320                                         |
| pNF-H    | NEFH<br>*p indicates phosphorylation | neurofilament heavy chain                                             | Human: 4747                                         |
| PRELP    | PRELP                                | proline and arginine rich end leucine rich repeat protein             | Human: 5549                                         |
| PRG4     | PRG4                                 | proteoglycan 4                                                        | Human: 10216<br>Mouse: 96875<br>Bovine: 280867      |
| PROCR    | PROCR                                | protein C receptor                                                    | Goat: 102171169                                     |
| PRPH     | PRPH                                 | Peripherin                                                            | Human: 5630                                         |
| Prrg4    | Prrg4                                | proline rich and Gla domain 4                                         | Rat: 499847                                         |
| PTGS2    | Ptgs2                                | prostaglandin-endoperoxide synthase 2                                 | Rat: 29527                                          |

|         |         |                                                                              |                                                                    |
|---------|---------|------------------------------------------------------------------------------|--------------------------------------------------------------------|
| Ptprc   | Ptprc   | protein tyrosine phosphatase receptor type C                                 | Human: 19264                                                       |
| Rab38   | Rab38   | RAB38, member RAS oncogene family                                            | Rat: 252916                                                        |
| Rcn2    | RCN2    | reticulocalbin 2                                                             | Bovine: 512717                                                     |
| Ripk4   | Ripk4   | receptor-interacting serine-threonine                                        | Rat: 304053                                                        |
| RTN1    | RTN1    | Reticulon 1                                                                  | Human: 6252                                                        |
| S100A1  | S100A1  | S100 calcium binding protein A1                                              | Human: 6271                                                        |
| S100A2  | S100A2  | S100 calcium binding protein A2                                              | Human: 6273                                                        |
| S100b   | S100B   | S100 calcium binding protein B                                               | Bovine: 525716                                                     |
| Scx     | SCX     | scleraxis bHLH transcription factor                                          | Bovine: 615157                                                     |
| SEMA3A  | SEMA3A  | semaphorin 3A                                                                | Human: 10371                                                       |
| SEMA3C  | SEMA3C  | semaphorin 3C                                                                | Goat: 102183759                                                    |
| SHH     | SHH     | Sonic hedgehog signaling molecule                                            | Human: 6469<br>Mouse: 20423<br>Bovine: 286821<br>Monkey: 102120970 |
| SLC7A2  | SLC7A2  | solute carrier family 7 member 2                                             | Human: 6542                                                        |
| Slca1   | Slc2a1  | solute carrier family 2 member 1                                             | Human: 6513                                                        |
| SLPI    | SLPI    | secretory leukocyte peptidase inhibitor                                      | Human: 6590                                                        |
| SMO     | SMO     | smoothened, frizzled class receptor                                          | Human: 6608<br>Mouse: 319757<br>Monkey: 102121742                  |
| Snap25  | SNAP25  | synaptosome associated protein 25                                            | Human: 6616<br>Bovine: 540853                                      |
| Snorc   | SNORC   | secondary ossification center associated regulator of chondrocyte maturation | Bovine: 618319                                                     |
| Sod2    | SOD2    | superoxide dismutase 2                                                       | Human: 6648<br>Bovine: 281496                                      |
| Sostdc1 | SOSTDC1 | sclerostin domain containing 1                                               | Bovine: 523184                                                     |
| SOX10   | SOX10   | SRY-box transcription factor 10                                              | Human: 6663                                                        |
| Sox2    | SOX2    | SRY-box transcription factor 2                                               | Human: 6657<br>Bovine: 784383                                      |



|             |         |                                                                        |                                                                                 |
|-------------|---------|------------------------------------------------------------------------|---------------------------------------------------------------------------------|
| Sox9        | Sox9    | SRY-box transcription factor 9                                         | Human: 6662<br>Mouse: 20682<br>Bovine: 100336535<br>Rat: 140586                 |
| SPARC       | SPARC   | secreted protein acidic and cysteine rich                              | Human: 6678                                                                     |
| Spp1        | SPP1    | secreted phosphoprotein 1                                              | Bovine: 281499<br>Human: 6696                                                   |
| SPTSSB      | SPTSSB  | serine palmitoyltransferase small subunit B                            | Human: 165679                                                                   |
| SSP1        | SENP6   | SUMO specific peptidase 6                                              | Human: 26054                                                                    |
| STMN2       | STMN2   | stathmin 2                                                             | Human: 11075                                                                    |
| SYF2        | SYF2    | SYF2 pre-mRNA splicing factor                                          | Human: 25949                                                                    |
| TAF1D       | TAF1D   | TATA-box binding protein associated factor, RNA polymerase I subunit D | Human: 79101                                                                    |
| TBXT        | TBXT, T | T-box transcription factor T                                           | Human: 6862<br>Mouse: 20997<br>Rat: 360737                                      |
| TGFβ        | TGFB1   | transforming growth factor beta 1                                      | Human: 7040<br>Mouse: 21803<br>Bovine: 282089                                   |
| THBS2       | THBS2   | thrombospondin 2                                                       | Human: 7058                                                                     |
| Thbs4       | Thbs4   | thrombospondin 4                                                       | Human: 7060<br>Rat: 29220                                                       |
| Tie1        | TIE1    | tyrosine kinase with immunoglobulin like and EGF like domains 1        | Bovine: 280941                                                                  |
| Tie2 or TEK | TEK     | TEK receptor tyrosine kinase                                           | Human: 7010                                                                     |
| Timp1       | Timp1   | TIMP metalloproteinase inhibitor 1                                     | Rat: 7076                                                                       |
| Timp3       | TIMP3   | TIMP metalloproteinase inhibitor                                       | Bovine: 282094                                                                  |
| TLR4        | TLR4    | toll like receptor 4                                                   | Human: 7099                                                                     |
| TMED        | TMED1   | transmembrane p24 trafficking protein 1                                | Human: 11018A                                                                   |
| Tmnd        | Tmnd    | tenomodulin                                                            | Mouse: 64103                                                                    |
| TNFα        | TNF     | tumor necrosis factor                                                  | Human: 7124<br>Mouse: 21926<br>Bovine: 280943<br>Goat: 100861232<br>Dog: 403922 |

|          |          |                                           |                                                |
|----------|----------|-------------------------------------------|------------------------------------------------|
| TNFR1    | TNFRSF1A | TNF receptor superfamily member 1A        | Human: 7132                                    |
| TNFRSF1B | TNFRSF1B | TNF receptor superfamily member 1B        | Human: 7133                                    |
| TNFSF10  | TNFSF10  | TNF superfamily member 10                 | Goat: 102173335                                |
| Tnmd     | Tnmd     | tenomodulin                               | Bovine: 781292<br>Rat: 64104                   |
| TNC      |          | Tenascin-C, cytoactin                     | Human: 3371<br>Mouse: 21923<br>Bovine: 540664  |
| UPP1     | UPP1     | uridine phosphorylase 1                   | Human: 7378                                    |
| UTS2R    | Utsr2    | urotensin 2 receptor                      | Human: 2837<br>Mouse: 217369<br>Bovine: 286969 |
| Vdr      | Vdr      | vitamin D receptor                        | Rat: 22337                                     |
| VEGF     | VEGFA    | vascular endothelial growth factor A      | Human: 7422<br>Goat: 100860957                 |
| VIM      | VIM      | vimentin                                  | Human: 7431                                    |
| Wdr73    | WDR73    | WD repeat domain 73                       | Bovine: 783802                                 |
| Wnt4     | WNT4     | Wnt family member 4                       | Rat: 84426                                     |
| Zscan10  | Znf206   | zinc finger and SCAN domain containing 10 | Mouse: 332221<br>Bovine: 538853                |

Supplementary Table: Table information compiled from NCBI Gene [1] represents the agreed upon abbreviation and name of each gene in addition to the gene ID.

1. Gene [Internet]. Bethesda (MD): National Library of Medicine (US), National Center for Biotechnology Information; 2004 – cited 2023 Jun. 30. Available from: <https://www.ncbi.nlm.nih.gov/gene/>
